# Supplementary material
Source: publisher figshare collection journal article supplement (https://gsajournals.figshare.com/ndownloader/files/14078129)
Supplement: Supplementary file 1 [file 14078129]

## Sheet: FY BHAProcess5402
Date	Mon Dec 10 19:05:26 EST 2018							FY BHAProcess5402
Email	ztang@kecksci.claremont.edu
Aspect	P
P-value cutoff	0.05
Calculate FDR	Yes
Regulation links followed	Yes
Bonferroni correction	Yes
Annotation file	gene_association.pombase
Evidence codes used	IEA (3394)	IEP (27)		IGI (839)	HDA (6913)	IBA (13043)	IPI (2678)	ND (2235)	IC (1728)	ISS (1473)	IDA (7197)	IMP (4649)	HMP (1535)	TAS (401)	EXP (701)	ISM (1559)	NAS (732)	ISO (5224)
Unknown identifiers (2)	SPAC9E9.17c SPBC1921.04c
GOID	TERM	CORRECTED_PVALUE	log10(1/p)	UNCORRECTED_PVALUE	NUM_LIST_ANNOTATIONS	LIST_SIZE	TOTAL_NUM_ANNOTATIONS	POPULATION_SIZE	FDR_RATE	EXPECTED_FALSE_POSITIVES	ANNOTATED_GENES
GO:0006914	autophagy	0.0108216	1.96571	9.1168e-06	14	300	65	5402	0	0	SPAC10F6.11c	SPAC22H12.05c	SPBC4B4.10c	SPAC1687.09	SPBC1D7.03	SPAC1783.06c	SPCC1682.11c	SPAC1D4.03c	SPAC25H1.03	SPBC354.07c	SPAC25A8.02	SPBC21B10.04c	SPBC31E1.01c	SPBC11G11.01
GO:0061919	process utilizing autophagic mechanism	0.0108216	1.96571	9.1168e-06	14	300	65	5402	0	0	SPAC10F6.11c	SPAC22H12.05c	SPBC4B4.10c	SPAC1687.09	SPBC1D7.03	SPAC1783.06c	SPCC1682.11c	SPAC1D4.03c	SPAC25H1.03	SPBC354.07c	SPAC25A8.02	SPBC21B10.04c	SPBC31E1.01c	SPBC11G11.01
GO:0035556	intracellular signal transduction	0.0309126	1.50986	2.60426e-05	31	300	256	5402	0.02	0.06	SPCC1223.11	SPAC19A8.03	SPAC23H3.13c	SPCC23B6.03c	SPAC16.01	SPBC21.05c	SPAC29A4.11	SPAC227.07c	SPCC1442.01	SPBP23A10.10	SPCC645.06c	SPBC530.14c	SPAC19E9.02	SPCC1753.02c	SPBC8D2.19	SPAC9G1.02	SPAC16E8.09	SPBC106.01	SPAC13G6.15c	SPBC23E6.08	SPAC23C4.03	SPAPB2B4.03	SPAC8C9.03	SPAC12G12.01c	SPAC27D7.03c	SPAC167.01	SPAC13A11.01c	SPAC6F6.01	SPBC21B10.04c	SPBC106.10	SPAC22H10.04

## Sheet: FY BPAProcess5402
Date	Mon Dec 10 23:14:47 EST 2018						FY BPAProcess5402
Email	ztang@kecksci.claremont.edu
Aspect	P
Total number of genes override	2788
P-value cutoff	0.05
Calculate FDR	Yes
Regulation links followed	Yes
Bonferroni correction	Yes
Annotation file	gene_association.pombase
Evidence codes used	IEA (3394), IGI (839), IEP (27), IBA (13043), HDA (6913), IPI (2678), ND (2235), IC (1728), ISS (1473), HMP (1535), IMP (4649), IDA (7197), TAS (401), ISM (1559), EXP (701), NAS (732), ISO (5224)
GOID	TERM	CORRECTED_PVALUE	log10(1/p)	UNCORRECTED_PVALUE	NUM_LIST_ANNOTATIONS	LIST_SIZE	TOTAL_NUM_ANNOTATIONS	POPULATION_SIZE	FDR_RATE	EXPECTED_FALSE_POSITIVES	ANNOTATED_GENES
GO:0006298	mismatch repair	0.000694626	3.15825	9.24934e-07	6	117	17	5402	0	0	SPAC19G12.02c, SPBC1703.04, SPCC285.16c, SPAC12B10.12c, SPAC8F11.03, SPBC29A10.05
GO:0000710	meiotic mismatch repair	0.0007723	3.11221	1.02836e-06	4	117	5	5402	0	0	SPAC19G12.02c, SPCC285.16c, SPAC8F11.03, SPBC29A10.05
GO:0051716	cellular response to stimulus	0.00679059	2.16809	9.04206e-06	36	117	808	5402	0	0	SPCC1223.11, SPBC4B4.10c, SPAC19A8.03, SPBC1778.10c, SPCP25A2.02c, SPBC530.05, SPCC645.06c, SPBC1703.04, SPBC1778.05c, SPAC23G3.03, SPAC9.05, SPBC1778.02, SPBC106.01, SPAC1B3.10c, SPAPB1E7.02c, SPBC1734.06, SPAC2F7.06c, SPAC8F11.03, SPAC22F3.03c, SPBC1105.10, SPBPJ4664.06, SPCC1919.03c, SPBC887.04c, SPBC3E7.02c, SPCC23B6.03c, SPAC16.01, SPAC139.01c, SPAC227.07c, SPAC12B10.12c, SPCC737.06c, SPAC19…
GO:0006281	DNA repair	0.00758873	2.11983	1.01048e-05	16	117	211	5402	0.005	0.02	SPBC887.04c, SPCC23B6.03c, SPAC139.01c, SPCP25A2.02c, SPBC1703.04, SPAC12B10.12c, SPAC9.05, SPAPB1E7.02c, SPBC1734.06, SPAC2F7.06c, SPAC8F11.03, SPAC19G12.02c, SPAC20H4.07, SPCC285.16c, SPAC22F3.03c, SPBC29A10.05
GO:0006974	cellular response to DNA damage stimulus	0.0204137	1.69008	2.71821e-05	17	117	254	5402	0.004	0.02	SPBC887.04c, SPCC23B6.03c, SPAC139.01c, SPCP25A2.02c, SPBC1703.04, SPAC12B10.12c, SPAC9.05, SPBC1778.02, SPAPB1E7.02c, SPBC1734.06, SPAC2F7.06c, SPAC8F11.03, SPAC19G12.02c, SPAC20H4.07, SPCC285.16c, SPAC22F3.03c, SPBC29A10.05
GO:0033554	cellular response to stress	0.0389193	1.40984	5.18233e-05	25	117	502	5402	0.0033	0.02	SPCC1223.11, SPBC887.04c, SPCC1919.03c, SPBC3E7.02c, SPBC4B4.10c, SPCC23B6.03c, SPAC139.01c, SPCP25A2.02c, SPBC1703.04, SPAC12B10.12c, SPAC23G3.03, SPAC9.05, SPBC1778.02, SPAC1B3.10c, SPAPB1E7.02c, SPBC1734.06, SPAC2F7.06c, SPAC8F11.03, SPAC20H4.07, SPAC19G12.02c, SPAC167.01, SPAC22F3.03c, SPCC285.16c, SPBPJ4664.06, SPBC29A10.05
GO:0050896	response to stimulus	0.0416062	1.38084	5.54011e-05	36	117	876	5402	0.0029	0.02	SPCC1223.11, SPBC4B4.10c, SPAC19A8.03, SPBC1778.10c, SPCP25A2.02c, SPBC530.05, SPCC645.06c, SPBC1703.04, SPBC1778.05c, SPAC23G3.03, SPAC9.05, SPBC1778.02, SPBC106.01, SPAC1B3.10c, SPAPB1E7.02c, SPBC1734.06, SPAC2F7.06c, SPAC8F11.03, SPAC22F3.03c, SPBC1105.10, SPBPJ4664.06, SPCC1919.03c, SPBC887.04c, SPBC3E7.02c, SPCC23B6.03c, SPAC16.01, SPAC139.01c, SPAC227.07c, SPAC12B10.12c, SPCC737.06c, SPAC19…

## Sheet: BY BHA process ontology
Date	Tue	Dec		11	01:55:22	EST	2018		BY BHA process ontology
Aspect	P
P-value	cutoff	0.05
Calculate	FDR	Yes
Regulation	links	followed		Yes
Bonferroni	correction	Yes
Annotation	file	gene_association.sgd
Evidence	codes	used		IEA	-49635	IGI	-5673	IEP	-44	HDA	-14431	IBA	-14651	IPI	-2431	ND	-3682	IC	-1426	ISS	-1757	IMP	-13510	IDA	-16814	HMP	-159	TAS	-420	ISM	-2065	NAS	-100	ISO	-7	HGI	-11	ISA	-302
Duplicates	in	input		list	-1	YKL002W
Unknown	identifiers	-12		YCL026C	YCL046W	YOR170W	YDR193W	YBL094C	YLR434C	YML010C-B	YDR008C	YNR005C	YPR050C	YKR035C	YDR136C
GOID	TERM	CORRECTED_PVALUE	log10(1/p)	UNCORRECTED_PVALUE	NUM_LIST_ANNOTATIONS	LIST_SIZE	TOTAL_NUM_ANNOTATIONS	POPULATION_SIZE	FDR_RATE	EXPECTED_FALSE_POSITIVES	ANNOTATED_GENES
GO:0034067	protein localization to Golgi apparatus	1.25434e-08	7.90159	1.62479e-11	9	154	17	7166	0	0	YKR001C	YJL154C	YPL051W	YDR372C	YOR069W	YJL004C	YKL002W	YHR079C	YPR173C
GO:0051641	cellular localization	7.81178e-05	4.10725	1.01189e-07	45	154	946	7166	0	0	YPL051W	YOR069W	YHR030C	YLR148W	YOL072W	YDR293C	YHR155W	YPL066W	YAL002W	YLR025W	YKR001C	YDL065C	YOR198C	YJL154C	YNL297C	YPL232W	YPL120W	YCR086W	YOL076W	YPR173C	YKL197C	YJR102C	YPR149W	YLR119W	YER083C	YNL064C	YDR200C	YNL257C	YOR070C	YJL004C	YKL002W	YHR079C	YER129W	YOR293W	YNR051C	YAL023C	YGR063C	YPL226W	YDR372C
GO:0070727	cellular macromolecule localization	0.000137603	3.86137	1.78242e-07	38	154	737	7166	0	0	YPL051W	YOR069W	YHR030C	YLR148W	YOL072W	YDR293C	YPL066W	YAL002W	YKR001C	YOR198C	YDL065C	YJL154C	YNL297C	YPL232W	YPL120W	YCR086W	YPR173C	YKL197C	YJR102C	YPR149W	YLR119W	YER083C	YNL064C	YDR200C	YOR070C	YJL004C	YKL002W	YHR079C	YER129W	YOR293W	YAL023C	YGR063C	YPL226W	YDR372C	YEL027W	YPL065W	YLR436C	YNL298W
GO:0033036	macromolecule localization	0.000180193	3.74426	2.33411e-07	45	154	973	7166	0	0	YPL051W	YOR069W	YHR030C	YLR148W	YOL072W	YDR293C	YHR155W	YPL066W	YAL002W	YLR025W	YKR001C	YOR198C	YDL065C	YJL154C	YNL297C	YPL232W	YPL120W	YCR086W	YPR173C	YKL197C	YJR102C	YPR149W	YLR119W	YER083C	YNL064C	YDR200C	YNL257C	YOR070C	YJL004C	YNL229C	YKL002W	YHR079C	YER129W	YOR293W	YAL023C	YGR063C	YNL231C	YPL226W	YOR109W
GO:0007034	vacuolar transport	0.00101482	2.99361	1.31454e-06	14	154	138	7166	0	0	YLR025W	YKR001C	YLR119W	YDR484W	YEL027W	YDR200C	YLR148W	YNL297C	YKL002W	YPL065W	YAL002W	YPL120W	YPR173C	YJR102C
GO:0045053	protein retention in Golgi apparatus	0.00138061	2.85993	1.78836e-06	5	154	11	7166	0	0	YKR001C	YKL002W	YJL154C	YPR173C	YOR069W
GO:0034613	cellular protein localization	0.00158076	2.80113	2.04762e-06	35	154	714	7166	0	0	YPL051W	YOR069W	YHR030C	YLR148W	YOL072W	YPL066W	YAL002W	YKR001C	YDL065C	YJL154C	YNL297C	YPL232W	YPL120W	YCR086W	YPR173C	YKL197C	YJR102C	YPR149W	YLR119W	YER083C	YNL064C	YDR200C	YOR070C	YJL004C	YKL002W	YHR079C	YER129W	YOR293W	YAL023C	YPL226W	YDR372C	YEL027W	YPL065W	YLR436C	YNL298W
GO:0046907	intracellular transport	0.00159452	2.79737	2.06544e-06	33	154	651	7166	0	0	YPL051W	YOR069W	YHR030C	YLR148W	YOL072W	YHR155W	YAL002W	YLR025W	YKR001C	YDL065C	YJL154C	YNL297C	YPL232W	YPL120W	YPR173C	YKL197C	YJR102C	YLR119W	YNL257C	YDR200C	YNL064C	YOR070C	YJL004C	YKL002W	YOR293W	YNR051C	YAL023C	YPL226W	YEL027W	YDR484W	YPL065W	YLR436C	YNL298W
GO:0051649	establishment of localization in cell	0.00211234	2.67524	2.7362e-06	34	154	691	7166	0	0	YPL051W	YOR069W	YHR030C	YLR148W	YOL072W	YHR155W	YAL002W	YLR025W	YKR001C	YDL065C	YJL154C	YNL297C	YPL232W	YPL120W	YCR086W	YPR173C	YKL197C	YJR102C	YLR119W	YNL064C	YNL257C	YDR200C	YOR070C	YJL004C	YKL002W	YOR293W	YNR051C	YAL023C	YPL226W	YEL027W	YDR484W	YPL065W	YLR436C	YNL298W
GO:0046618	drug export	0.00286714	2.54255	3.71391e-06	6	154	21	7166	0	0	YLR025W	YLR119W	YKL002W	YPL065W	YJR102C	YOR153W
GO:0065007	biological regulation	0.0031081	2.5075	4.02604e-06	70	154	2036	7166	0	0	YOR228C	YOR153W	YER068W	YLL002W	YLR148W	YKR031C	YOR360C	YOR242C	YNL136W	YKR001C	YDL065C	YOL076W	YKL197C	YJR102C	YPR149W	YGL175C	YCR024C-A	YJL129C	YPL161C	YJR040W	YNL229C	YOR070C	YHR079C	YDR448W	YJL056C	YGR063C	YDR372C	YDR484W	YEL027W	YGR162W	YNL298W	YOR171C	YOR069W	YHR030C	YFL031W	YPL129W	YDR293C	YOL072W	YHR155W
GO:0045184	establishment of protein localization	0.00320589	2.49405	4.15271e-06	34	154	704	7166	0	0	YPL051W	YOR069W	YHR030C	YLR148W	YOL072W	YAL002W	YLR025W	YKR001C	YDL065C	YJL154C	YNL297C	YPL232W	YPL120W	YPR173C	YKL197C	YJR102C	YPR149W	YLR119W	YER083C	YNL064C	YDR200C	YOR070C	YJL004C	YKL002W	YOR293W	YAL023C	YPL226W	YOR109W	YEL027W	YDR484W	YDR372C	YPL065W	YLR436C	YNL298W
GO:0008104	protein localization	0.00339357	2.46934	4.39581e-06	39	154	871	7166	0	0	YPL051W	YOR069W	YHR030C	YLR148W	YOL072W	YPL066W	YAL002W	YLR025W	YKR001C	YDL065C	YJL154C	YNL297C	YPL232W	YPL120W	YCR086W	YPR173C	YKL197C	YJR102C	YPR149W	YLR119W	YER083C	YNL064C	YDR200C	YOR070C	YJL004C	YNL229C	YKL002W	YHR079C	YER129W	YOR293W	YAL023C	YPL226W	YOR109W	YDR372C	YDR484W	YEL027W	YPL065W	YLR436C	YNL298W
GO:0016192	vesicle-mediated transport	0.00378616	2.4218	4.90435e-06	25	154	434	7166	0	0	YLR119W	YER083C	YPL051W	YOR069W	YLR148W	YJL004C	YOR070C	YKL002W	YKR031C	YAL002W	YNR051C	YLR025W	YKR001C	YJL154C	YOR109W	YDR372C	YDR484W	YEL027W	YCL034W	YNL297C	YPL232W	YPL065W	YPL120W	YPR173C	YJR102C
GO:0051179	localization	0.00387431	2.41181	5.01853e-06	58	154	1568	7166	0	0	YPL051W	YOR069W	YOR153W	YLL005C	YHR030C	YLR148W	YOL072W	YDR293C	YHR155W	YKR031C	YPL066W	YAL002W	YLR025W	YKR001C	YDL065C	YOR198C	YDR456W	YJL154C	YNL297C	YPL232W	YPL120W	YCR086W	YOL076W	YPR173C	YKL197C	YJR102C	YHR026W	YPR149W	YLR119W	YJL129C	YER083C	YJR040W	YNL064C	YDR200C	YNL257C	YNL229C	YJL004C	YOR070C	YKL002W
GO:0033365	protein localization to organelle	0.00394435	2.40402	5.10926e-06	25	154	435	7166	0	0	YLR119W	YER083C	YPL051W	YOR069W	YHR030C	YNL064C	YDR200C	YJL004C	YKL002W	YER129W	YHR079C	YAL002W	YDL065C	YKR001C	YJL154C	YDR372C	YEL027W	YNL297C	YPL065W	YPL120W	YCR086W	YPR173C	YKL197C	YJR102C	YNL298W
GO:0015031	protein transport	0.00441541	2.35503	5.71944e-06	33	154	682	7166	0	0	YPL051W	YOR069W	YHR030C	YLR148W	YOL072W	YAL002W	YLR025W	YKR001C	YDL065C	YJL154C	YNL297C	YPL232W	YPL120W	YPR173C	YKL197C	YJR102C	YPR149W	YLR119W	YNL064C	YDR200C	YOR070C	YJL004C	YKL002W	YOR293W	YAL023C	YPL226W	YOR109W	YEL027W	YDR484W	YDR372C	YPL065W	YLR436C	YNL298W
GO:0015833	peptide transport	0.00622459	2.20589	8.06294e-06	33	154	693	7166	0	0	YPL051W	YOR069W	YHR030C	YLR148W	YOL072W	YAL002W	YLR025W	YKR001C	YDL065C	YJL154C	YNL297C	YPL232W	YPL120W	YPR173C	YKL197C	YJR102C	YPR149W	YLR119W	YNL064C	YDR200C	YOR070C	YJL004C	YKL002W	YOR293W	YAL023C	YPL226W	YOR109W	YEL027W	YDR484W	YDR372C	YPL065W	YLR436C	YNL298W
GO:0042886	amide transport	0.0100956	1.99587	1.30773e-05	33	154	709	7166	0	0	YPL051W	YOR069W	YHR030C	YLR148W	YOL072W	YAL002W	YLR025W	YKR001C	YDL065C	YJL154C	YNL297C	YPL232W	YPL120W	YPR173C	YKL197C	YJR102C	YPR149W	YLR119W	YNL064C	YDR200C	YOR070C	YJL004C	YKL002W	YOR293W	YAL023C	YPL226W	YOR109W	YEL027W	YDR484W	YDR372C	YPL065W	YLR436C	YNL298W
GO:1904669	ATP export	0.0166554	1.77845	2.15743e-05	5	154	17	7166	0	0	YLR025W	YLR119W	YKL002W	YPL065W	YJR102C
GO:0006623	protein targeting to vacuole	0.019809	1.70314	2.56593e-05	8	154	57	7166	0	0	YDR200C	YKR001C	YNL297C	YLR119W	YPL065W	YAL002W	YEL027W	YJR102C
GO:0045324	late endosome to vacuole transport	0.0328264	1.48378	4.25213e-05	8	154	61	7166	0	0	YLR025W	YLR148W	YKL002W	YPL065W	YPL120W	YAL002W	YPR173C	YJR102C
GO:0016197	endosomal transport	0.0335107	1.47482	4.34076e-05	10	154	98	7166	0	0	YLR119W	YJL154C	YDR484W	YOR069W	YKL002W	YPL065W	YAL002W	YPL120W	YPR173C	YJR102C
GO:0006810	transport	0.0396027	1.40228	5.12988e-05	49	154	1336	7166	0	0	YPL051W	YOR069W	YOR153W	YLL005C	YHR030C	YLR148W	YOL072W	YHR155W	YKR031C	YAL002W	YLR025W	YKR001C	YDL065C	YDR456W	YJL154C	YNL297C	YPL232W	YPL120W	YPR173C	YKL197C	YJR102C	YHR026W	YPR149W	YLR119W	YJL129C	YER083C	YJR040W	YNL064C	YDR200C	YNL257C	YOR070C	YJL004C	YKL002W	YDR345C	YOR293W	YNR051C	YAL023C	YNL231C	YPL226W
GO:0051234	establishment of localization	0.0452481	1.3444	5.86115e-05	50	154	1381	7166	0	0	YPL051W	YOR069W	YOR153W	YLL005C	YHR030C	YLR148W	YOL072W	YHR155W	YKR031C	YAL002W	YLR025W	YKR001C	YDL065C	YDR456W	YJL154C	YNL297C	YPL232W	YPL120W	YCR086W	YPR173C	YKL197C	YJR102C	YHR026W	YPR149W	YLR119W	YJL129C	YER083C	YJR040W	YNL064C	YDR200C	YNL257C	YOR070C	YJL004C	YKL002W	YDR345C	YOR293W	YNR051C	YAL023C	YNL231C
[truncated: 31 more columns]

## Sheet: BY BPA process ontology
Date	Tue	Dec		11	02:17:51	EST	2018	BY bpa process ontoloty
Email	tina.negritto@pomona.edu
Aspect	P
P-value	cutoff	0.05
Calculate	FDR	Yes
Regulation	links	followed		Yes
Bonferroni	correction	Yes
Annotation file	gene_association.sgd
Evidence codes used	IEA (49635)	IGI (5673)		IEP (44)	HDA (14431)	IBA (14651)	IPI (2431)	ND (3682)	IC (1426)	ISS (1757)	IMP (13510)	IDA (16814)	HMP (159)	TAS (420)	ISM (2065)	NAS (100)	ISO (7)	HGI (11)	ISA (302)
Unknown identifiers (11)	YJL188C YLR062C YKL076C YAL066W YCL013W YCR087W YKL118W YDR203W YJL022W YNL296W YMR193C-A
GOID	TERM	CORRECTED_PVALUE	log10(1/p)	UNCORRECTED_PVALUE	NUM_LIST_ANNOTATIONS	LIST_SIZE	TOTAL_NUM_ANNOTATIONS	POPULATION_SIZE	FDR_RATE	EXPECTED_FALSE_POSITIVES	ANNOTATED_GENES
GO:0043044	ATP-dependent chromatin remodeling	0.0018252	2.73869	2.07174e-06	8	159	40	7166	0	0	YNL107W	YBL006C	YJL176C	YLR399C	YLR085C	YDR485C	YMR091C	YGR056W
GO:0006996	organelle organization	0.00239294	2.62107	2.71616e-06	58	159	1486	7166	0	0	YNL243W	YMR032W	YER155C	YBL079W	YLR148W	YLR168C	YCR002C	YLR085C	YDR389W	YMR247C	YMR077C	YNL225C	YJL176C	YCL010C	YMR224C	YPL017C	YKR020W	YPL236C	YDL188C	YLR295C	YLR399C	YLR015W	YGR056W	YMR091C	YER048C	YML013W	YKL037W	YIL105C	YBR179C	YBL006C	YJL184W	YJL106W	YDR195W	YML024W	YLR423C	YNL064C	YGL095C	YDR126W	YDR419W
GO:0030004	cellular monovalent inorganic cation homeostasis	0.00269761	2.56902	3.06198e-06	8	159	42	7166	0	0	YGL095C	YOR270C	YGR020C	YOR054C	YCL005W-A	YLR138W	YPL234C	YKL119C
GO:0016043	cellular component organization	0.00307043	2.5128	3.48517e-06	73	159	2076	7166	0.005	0.02	YNL243W	YMR032W	YBL079W	YHR205W	YLR148W	YLR168C	YLR085C	YCL005W-A	YDR389W	YGR167W	YMR077C	YCL010C	YKR020W	YDL188C	YLR015W	YGR056W	YBR179C	YLR242C	YBL006C	YDR195W	YML024W	YLR423C	YKL119C	YDR074W	YDR419W	YMR231W	YDR448W	YPL240C	YAL016W	YPL152W	YLR135W	YHR073W	YMR035W	YDL005C	YBR107C	YHR090C	YER155C	YHR184W	YCR002C
GO:0055067	monovalent inorganic cation homeostasis	0.00390086	2.40884	4.42777e-06	8	159	44	7166	0.004	0.02	YGL095C	YOR270C	YGR020C	YOR054C	YCL005W-A	YLR138W	YPL234C	YKL119C
GO:0065007	biological regulation	0.00657974	2.18179	7.46849e-06	71	159	2036	7166	0.01	0.06	YNL243W	YMR032W	YCL008C	YBL079W	YGR184C	YDR466W	YOR153W	YHR205W	YLR148W	YLR168C	YOR360C	YCL005W-A	YDR389W	YGR167W	YCL010C	YKR020W	YDL188C	YMR070W	YLR015W	YGR056W	YLR179C	YLR242C	YDR195W	YLR138W	YLR423C	YKL119C	YMR231W	YDR448W	YPL240C	YAL016W	YPL152W	YLR135W	YHR073W	YDL005C	YGR020C	YPL234C	YER155C	YNR023W	YOR054C
GO:0050896	response to stimulus	0.00670917	2.17333	7.6154e-06	51	159	1276	7166	0.0086	0.06	YMR032W	YNR023W	YER155C	YCL008C	YGR184C	YDR466W	YOR153W	YHR205W	YDR289C	YML011C	YOR360C	YDR389W	YMR214W	YMR077C	YJL176C	YNL133C	YMR224C	YLR399C	YJL165C	YMR070W	YGR056W	YMR091C	YLR179C	YML013W	YLR119W	YKL139W	YIL105C	YJL106W	YNL283C	YLR138W	YMR250W	YNL064C	YDR074W	YDR419W	YJL140W	YKL075C	YML014W	YDR448W	YPL240C
GO:0044107	cellular alcohol metabolic process	0.00992983	2.00306	1.12711e-05	7	159	36	7166	0.01	0.08	YMR202W	YMR015C	YMR070W	YJL176C	YGL012W	YNL280C	YML008C
GO:0016125	sterol metabolic process	0.0142469	1.84628	1.61713e-05	8	159	52	7166	0.0133	0.12	YMR202W	YMR015C	YLR242C	YNL280C	YLR020C	YMR070W	YGL012W	YML008C
GO:0008202	steroid metabolic process	0.0164669	1.78339	1.86912e-05	8	159	53	7166	0.012	0.12	YMR202W	YMR015C	YLR242C	YNL280C	YLR020C	YMR070W	YGL012W	YML008C
GO:0007035	vacuolar acidification	0.0192459	1.71566	2.18455e-05	6	159	27	7166	0.0109	0.12	YGL095C	YOR270C	YGR020C	YCL005W-A	YPL234C	YKL119C
GO:0045851	pH reduction	0.0192459	1.71566	2.18455e-05	6	159	27	7166	0.01	0.12	YGL095C	YOR270C	YGR020C	YCL005W-A	YPL234C	YKL119C
GO:0051452	intracellular pH reduction	0.0192459	1.71566	2.18455e-05	6	159	27	7166	0.0092	0.12	YGL095C	YOR270C	YGR020C	YCL005W-A	YPL234C	YKL119C
GO:0035542	regulation of SNARE complex assembly	0.0237577	1.6242	2.69667e-05	4	159	9	7166	0.0114	0.16	YLR148W	YGL095C	YPL045W	YMR231W
GO:0050794	regulation of cellular process	0.0253881	1.59537	2.88173e-05	57	159	1561	7166	0.0107	0.16	YNL243W	YMR032W	YNR023W	YER155C	YCL008C	YBL079W	YOR054C	YDR466W	YHR205W	YDR289C	YLR148W	YLR168C	YOR360C	YDR389W	YGR167W	YMR247C	YJL176C	YCL010C	YMR224C	YPL017C	YKR020W	YPL101W	YPL236C	YDL188C	YLR399C	YJL165C	YMR070W	YLR015W	YGR056W	YLR179C	YIL105C	YKL139W	YJL184W	YJL106W	YDR195W	YNL283C	YLR423C	YGL095C	YDR126W
GO:0044088	regulation of vacuole organization	0.0297705	1.52621	3.37917e-05	6	159	29	7166	0.01	0.16	YDL188C	YLR148W	YPL045W	YMR231W	YLR423C	YPL236C
GO:0006895	Golgi to endosome transport	0.0301748	1.52036	3.42506e-05	5	159	18	7166	0.0094	0.16	YLR148W	YGL095C	YPL045W	YMR231W	YGL206C
GO:0051716	cellular response to stimulus	0.035481	1.45	4.02736e-05	44	159	1099	7166	0.01	0.18	YMR032W	YNR023W	YER155C	YGR184C	YDR466W	YHR205W	YDR289C	YML011C	YOR360C	YDR389W	YMR214W	YJL176C	YNL133C	YMR224C	YLR399C	YJL165C	YMR070W	YGR056W	YMR091C	YLR179C	YML013W	YKL139W	YIL105C	YJL106W	YNL283C	YMR250W	YNL064C	YDR074W	YDR419W	YJL140W	YML014W	YDR448W	YPL240C	YOR212W	YOL123W	YNL107W	YOR258W	YER014C-A	YER095W
GO:0006696	ergosterol biosynthetic process	0.036536	1.43728	4.1471e-05	6	159	30	7166	0.0095	0.18	YMR202W	YMR015C	YMR070W	YGL012W	YNL280C	YML008C
GO:0016129	phytosteroid biosynthetic process	0.036536	1.43728	4.1471e-05	6	159	30	7166	0.009	0.18	YMR202W	YMR015C	YMR070W	YGL012W	YNL280C	YML008C
GO:0044108	cellular alcohol biosynthetic process	0.036536	1.43728	4.1471e-05	6	159	30	7166	0.0086	0.18	YMR202W	YMR015C	YMR070W	YGL012W	YNL280C	YML008C
GO:0097384	cellular lipid biosynthetic process	0.036536	1.43728	4.1471e-05	6	159	30	7166	0.0082	0.18	YMR202W	YMR015C	YMR070W	YGL012W	YNL280C	YML008C
GO:0006338	chromatin remodeling	0.03837	1.41601	4.35528e-05	10	159	95	7166	0.0078	0.18	YNL107W	YBL079W	YBL006C	YJL176C	YLR399C	YDR448W	YLR085C	YDR485C	YMR091C	YGR056W
GO:0031338	regulation of vesicle fusion	0.0389127	1.40991	4.41688e-05	4	159	10	7166	0.0075	0.18	YLR148W	YGL095C	YPL045W	YMR231W
GO:1902653	secondary alcohol biosynthetic process	0.0444805	1.35183	5.04887e-05	6	159	31	7166	0.0072	0.18	YMR202W	YMR015C	YMR070W	YGL012W	YNL280C	YML008C
GO:0050789	regulation of biological process	0.0467868	1.32988	5.31065e-05	59	159	1670	7166	0.0069	0.18	YNL243W	YMR032W	YNR023W	YER155C	YCL008C	YBL079W	YOR054C	YGR184C	YDR466W	YHR205W	YDR289C	YLR148W	YLR168C	YOR360C	YDR389W	YGR167W	YMR247C	YJL176C	YCL010C	YMR224C	YPL017C	YKR020W	YPL101W	YPL236C	YDL188C	YLR399C	YJL165C	YMR070W	YLR015W	YGR056W	YLR179C	YIL105C	YKL139W	YJL184W	YJL106W	YDR195W	YNL283C	YLR423C	YGL095C
GO:0071840	cellular component organization or biogenesis	0.047157	1.32645	5.35267e-05	78	159	2437	7166	0.0067	0.18	YNL243W	YMR032W	YBL079W	YGL136C	YHR205W	YLR148W	YLR168C	YLR085C	YCL005W-A	YDR389W	YGR167W	YMR077C	YCL010C	YKR020W	YDL188C	YLR015W	YGR056W	YBR179C	YLR242C	YBL006C	YDR195W	YML024W	YLR423C	YKL119C	YDR074W	YDR419W	YMR231W	YDR448W	YPL240C	YAL016W	YPL152W	YLR135W	YHR073W	YEL036C	YMR035W	YDL005C	YLR074C	YBR107C	YHR090C
[truncated: 39 more columns]

## Sheet: OverlappingGoTerms
overlapping go terms between yeasts
bpa process			FY p value	BY p value
response to stimulus			0.0416062	0.00670917
cellular response to stimulus			0.00679059	0.035481
BPA function
none
BPA component
none
BHA process
none
BHA function
none
BHA component
none
